# Supplementary material for: The C. elegans embryonic transcriptome with tissue, time, and alternative splicing resolution
Source: Genome Res. 2019 Jun;29(6):1036–45. doi: 10.1101/gr.243394.118 (PMC6581053; doi:10.1101/gr.243394.118)
Supplement: Supplemental Material [file supp_gr.243394.118_Supplemental_File_S5.xlsx]

## Sheet: Zhao et al and Y105E8A.3
Warner et al., 2018
	Zhao et al (2015) table with added counts for Warner et al, 2018, FACS samples; uniquely aligned, PCR duplicates removed, -q 20 -Q 25
					A:C:G:T												%age G
Strand	Chr	Gene (function)	WS230	WS245	Zhao counts	ceh32	cnd1	end1	hlh1	nhr25	pha4	tbx37		Chr	Gene (function)	WS245	Zhao	ceh32	cnd1	end1	hlh1	nhr25	pha4	tbx37
plus	I	F46F11.7 (keratin-associated protein 4-7)	5621062	5621059	18:0:2:0	91:0:0:0	145:0:0:0	44:0:0:0	57:0:0:0	295:0:3:0	26:0:0:0	165:0:3:0		I	F46F11.7 (keratin-associated protein 4-7)	5621059	10	0	0	0	0	1	0	1
plus	I	K04F10.7 (FAM76B)	6367273	6367271	181:0:15:0	283:0:0:0	1431:0:1:1	956:0:2:1	2100:2:3:2	1100:0:0:0	1010:1:1:0	2363:0:1:0		I	K04F10.7 (FAM76B)	6367271	7	0	0	0	0	0	0	0
minus	I	E03H4.8 (similar to coatomer subunit beta)	12424968	12424978	66:0:6:0	35:0:0:0	98:0:1:0	37:0:0:0	99:0:0:0	53:0:0:0	23:0:0:0	105:0:0:1		I	E03H4.8 (similar to coatomer subunit beta)	12424978	8	0	1	0	0	0	0	0
plus	I	Y105E8A.3 (containing cation efflux protein transmembrane domain)	14361167	14361180	75:0:63:0	264:0:73:0	863:0:179:0	691:0:211:0	1200:0:298:0	1591:1:328:2	669:0:169:1	2068:0:368:0		I	Y105E8A.3 (containing cation efflux protein transmembrane domain)	14361180	45	21	17	23	19	17	20	15
minus	II	lsm-4 (Sm-like protein)	7252982	7253023	178:0:8:0	386:0:0:0	976:2:1:0	532:0:1:0	1199:5:0:0	873:1:0:0	640:3:1:0	1400:4:2:0		II	lsm-4 (Sm-like protein)	7253023	4	0	0	0	0	0	0	0
plus	IV	C06G3.5 (ADA ortholog)	7026553	7026564	209:0:13:0	572:0:1:0	3785:0:14:0	833:0:1:0	1754:0:10:0	1713:0:4:1	1641:1:10:0	3612:0:22:1		IV	C06G3.5 (ADA ortholog)	7026564	5	0	0	0	0	0	0	0
plus	IV	ssq-1 (sperm-specific family, class Q)	9853000	9853020	161:0:8:0	1:0:0:0	3:0:0:0	1:0:0:0	1:0:0:0	0:0:0:0	0:0:0:0	3:0:0:0		IV	ssq-1 (sperm-specific family, class Q)	9853020	4	0	0	0	0	0	0	0
minus	IV	M04B2.6 (unknown)	11509884	11509906	89:0:42:0	14:0:0:0	123:0:0:0	57:0:0:0	68:0:0:0	116:0:0:1	33:0:0:0	26:0:0:0		IV	M04B2.6 (unknown)	11509906	32	0	0	0	0	0	0	0
minus	IV	Y57G11A.1 (neurofilament heavy polypeptide ortholog)	14490354	14490381	306:0:11:0	569:0:2:0	855:0:4:0	607:0:4:0	3540:0:25:2	1301:0:4:0	718:0:11:0	1398:0:7:0		IV	Y57G11A.1 (neurofilament heavy polypeptide ortholog)	14490381	3	0	0	0	0	0	1	0
minus	V	tam-1 (unknown)	4959508	4959522	358:0:46:0	10718:0:32:4	12619:1:23:1	1966:0:1:0	11364:3:17:2	5923:4:16:0	2683:3:6:0	17490:8:35:2		V	tam-1 (unknown)	4959522	11	0	0	0	0	0	0	0
minus	V	T28B11.1 (containing F-box)	10713865	10713885	336:0:18:0	115:0:1:0	323:0:1:1	751:0:4:0	917:0:2:3	913:0:4:4	588:0:1:1	820:0:1:1		V	T28B11.1 (containing F-box)	10713885	5	0	0	0	0	0	0	0
																	*percentage G = G*100/(A+G)
															RNA editing per tissue in Y105E8A.3
															tissue	*percentage G = G*100/(A+G)
															ceh32_T0	18.6059
															ceh32_T1	19.2029
															ceh32_T2	27.5943
															ceh32_T3	18.1111
															ceh32_T4	22.9167
															cnd1_T0	14.1439
															cnd1_T1	12.4721
															cnd1_T2	21.2782
															cnd1_T3	14.7675
															cnd1_T4	24.2236
		RNA editing per replicate in Y105E8A.3													end1_T0	20.5662
															end1_T1	14.794
		tissue	G*100/A+G, (i.e., %age of RNA reads edited in that sample)												end1_T2	18.5508
		ceh32repT0	17.8571												end1_T3	22.221
		ceh32rep2T0	19.3548												end1_T4	38.376
		ceh32repT1	21.7391
		ceh32rep2T1	16.6667												hlh1_T0	43.0074
		ceh32repT2	30.1887												hlh1_T1	34.1266
		ceh32rep2T2	25												hlh1_T2	40.3025
		ceh32repT3	22.2222												hlh1_T3	49.6656
		ceh32rep2T3	14												hlh1_T4	60.8221
		ceh32repT4	12.5
		ceh32rep2T4	33.3333												nhr25_T0	21.9716
															nhr25_T1	13.9009
		cnd1T0	12.9032												nhr25_T2	15.5507
		cnd1repT0	15.3846												nhr25_T3	14.7393
		cnd1T1	12.1622												nhr25_T4	19.5341
		cnd1repT1	12.782
		cnd1T2	20												pha4_T0	19.4565
		cnd1repT2	22.5564												pha4_T1	20.3104
		cnd1T3	16.1491												pha4_T2	18.1274
		cnd1repT3	13.3858												pha4_T3	26.3789
		cnd1T4	24.6377												pha4_T4	19.4734
		cnd1repT4	23.8095
															tbx37_T0	26.2415
		end1T0	17.3228												tbx37_T1	23.8451
		end1repT0	23.8095												tbx37_T2	21.0939
		end1T1	12.9213												tbx37_T3	19.2132
		end1repT1	16.6667												tbx37_T4	26.2552
		end1T2	23.1481
		end1repT2	13.9535
		end1T3	28.2258
		end1repT3	16.2162
		end1T4	44.4444
		end1repT4	32.3077
		hlh1T0	28.125
		hlh1rep2T0	19.4444
		hlh1rep3T0	17.1687
		hlh1rep4T0	21.2766
		hlh1T1	17.5
		hlh1rep2T1	17.8571
		hlh1rep3T1	19.2118
		hlh1rep4T1	13.6842
		hlh1T2	20
		hlh1rep2T2	17.1429
		hlh1rep3T2	21.0938
		hlh1rep4T2	22.3684
		hlh1T3	30.2326
		hlh1rep2T3	41.1765
		hlh1rep3T3	14.2857
		hlh1rep4T3	13.6364
		hlh1T4	32.5581
		hlh1rep2T4	41.6667
		hlh1rep3T4	27.4194
		hlh1rep4T4	20
		nhr25T0	21.466
		nhr25repT0	22.4771
		nhr25T1	14.4444
		nhr25repT1	13.3574
		nhr25T2	17.0588
		nhr25repT2	14.0426
		nhr25T3	14.094
		nhr25repT3	15.3846
		nhr25T4	16.7883
		nhr25repT4	22.2798
		pha4T0	12.987
		pha4repT0	25.9259
		pha4T1	17.5439
		pha4repT1	23.0769
		pha4T2	24.6269
		pha4repT2	11.6279
		pha4T3	19.4245
		pha4repT3	33.3333
		pha4T4	21.3793
		pha4repT4	17.5676
		tbx37rep3T0	13.4146
		tbx37rep4T0	17.1171
		tbx37repT0	21.9512
		tbx37rep3T1	13.7615
		tbx37rep4T1	12.5
		tbx37repT1	21.4286
		tbx37rep3T2	12.766
		tbx37rep4T2	14.557
		tbx37repT2	14.8649
		tbx37rep3T3	17.2043
		tbx37rep4T3	12.6506
		tbx37repT3	8.57143
		tbx37rep3T4	17.5793
		tbx37rep4T4	17.284
		tbx37repT4	17.6471
