# Supplementary material for: The C. elegans embryonic transcriptome with tissue, time, and alternative splicing resolution
Source: Genome Res. 2019 Jun;29(6):1036–45. doi: 10.1101/gr.243394.118 (PMC6581053; doi:10.1101/gr.243394.118)
Supplement: Supplemental Material [file supp_gr.243394.118_Supplemental_Guide.xlsx]

## Sheet: Sheet1
Supplemental_Guide.xlsx	This file which catalogs and provides a description for each of the supplemental files
Supplemental_Materials.docx	Contains all Supplemental Figures with Supplemental Figure Legends as well as smaller Tables
Supplemental_Methods.docx	Additional methods to supplement the main methods in the paper by providing higher levels of detail
Supplemental_Code.zip	All scripts needed to reproduce the analysis carried out in the preparation of this manuscript
Supplemental_Table_S1.doc	Tissues excluded from analysis for DESeq2 comparisons
Supplemental_Table_S2a.txt	Differentially expressed genes determined using DESeq2 and excluding samples that overlap in cell populations
Supplemental_Table_S2b.txt	Summary of differentially expressed genes determined using DESeq2 and excluding samples that overlap in cell populations
Supplemental_Table_S3.doc	Differential gene expression changing tissue specificity over time
Supplemental_Table_S4.txt	Genes stably expressed over time determined using DESeq2
Supplemental_Table_S5.txt	Fuzzy k-means clustering results
Supplemental_Table_S6.txt	Expression distance between adjacent genes in operons
Supplemental_Table_S7.docx	Differential splice junction and exon usage
Supplemental_Table_S8.doc	Differential usage of first exons
Supplemental_Table_S9a.txt	Differentially used first exons and junctions based on JunctionSeq pairwise comparisons
Supplemental_Table_S9b.txt	Differentially used exons and junctions higher in one tissue than in all others
Supplemental_Table_S9c.txt	Differentially used first exons lower in one tissue than in all others
Supplemental_Table_S9d.txt	List of all differentially used exons and junctions
Supplemental_Table_S10a.txt	89 initial exons and 24 initial splice junctions that were significantly more frequently used in one tissue than in all others
Supplemental_Table_S10b.txt	49 initial exons and 13 initial splice junctions that were significantly less frequently used in one tissue than in all other tissues
Supplemental_Table_S11.txt	Splice leader raw counts and reads per million
Supplemental_Table_S12.txt	Significant difference in raw read counts between two different genomic positions for SL1 and SL2 in two different samples
Supplemental_Table_S13.txt	Significant difference in raw read counts between SL1 and SL2 in two different samples
Supplemental_Table_S14.doc	Summary counts of tables Supplemental_Table_S12 and Supplemental_Table_S13
Supplemental_Table_S15.doc	Putative RNA editing events
Supplemental_Table_S16.doc	RNA editing event descriptions
Supplemental_Table_S17.xlsx	List of transcription factors used in this study
Supplemental_Table_S18.doc	List of transcription factors showing tissue-specificity based on DESeq2 analysis
Supplemental_Table_S19.doc	Transcription factors showing tissue-specificity by fuzzy k-means clustering
Supplemental_Table_S20.xlsx	Description and detail of all datasets used in this study
Supplemental_Table_S21.txt	Gene TPM per sample for all samples and replicates
Supplemental_Table_S22.txt	Gene TPM per sample after averaging across biological replicates
Supplemental_Fig_S1.pdf	Cell lineage trees for each marker strain used in this study
Supplemental_Fig_S2.pdf	Methodology for isolation of discrete cell types for RNA-seq
Supplemental_Fig_S3.pdf	Embryo synchronization leads to a tight window in the age of embryos
Supplemental_Fig_S4.pdf	Developmental timing of isolated cell populations
Supplemental_Fig_S5.pdf	PCA plots of all sample replicates
Supplemental_Fig_S6.pdf	Spearman's correlation values for all sequenced libraries
Supplemental_Fig_S7.pdf	Reads per million accounted for by histones
Supplemental_Fig_S8.pdf	Robust gene expression at TPM values above 15
Supplemental_Fig_S9.pdf	Differentially expressed genes within tissues over time
Supplemental_Fig_S10.tif	Gene density calculated using a Kernel Density Estimator
Supplemental_Fig_S11.pdf	Differentially expressed genes in pairwise comparisons between tissues
Supplemental_Fig_S12.pdf	Integrin adhesome genes clustered with similar gene expression patterns
Supplemental_Fig_S13.pdf	Proportion of SL1 trans-splicing in operons
Supplemental_Fig_S14.pdf	Proportion of SL2 splicing in operons
Supplemental_Fig_S15.pdf	Internal transcription factor binding sites in operons
Supplemental_Fig_S16.pdf	Specific SL usage for dif-1
Supplemental_Fig_S17.pdf	Specific SL usage for F12F6.1
Supplemental_Fig_S18.pdf	Differential exon usage for tln-1
Supplemental_Fig_S19.pdf	Examples of expression profiles for col-150 and col-125
Supplemental_Fig_S20.pdf	Saturation of sequencing as tested by subSeq
Supplemental_File_S1.zip	Gene ontology categories for all differentially expressed genes identified by DESeq2
Supplemental_File_S2.zip	Alternative splicing events including mutally exclusive exons, alternative 5' exons, alternative 3' or 5' splice sites, internal mutually exlusive introns, retained introns, and skipped exons
Supplemental_File_S3.bed	All identified sites where splice leader sequences have been added
Supplemental_File_S4.txt	Hypodermal and pharyngeal isoform protein sequences for FLN-2
Supplemental_File_S5.xlsx	Zhao et al (2015) RNA editing table with added counts for Warner et al, 2018, FACs samples; uniquely aligned, PCR duplicates removed
