# Supplementary material for: The C. elegans embryonic transcriptome with tissue, time, and alternative splicing resolution
Source: Genome Res. 2019 Jun;29(6):1036–45. doi: 10.1101/gr.243394.118 (PMC6581053; doi:10.1101/gr.243394.118)
Supplement: Supplemental Material [file supp_gr.243394.118_Supplemental_Table_S17.xlsx]

## Sheet: Sheet1
# Warner et al., 2018 - List of all transcription factors analyzed in this study
WBGene	Gene	Sequence
WBGene00000095	aha-1	C25A1.11
WBGene00000096	ahr-1	C41G7.5
WBGene00000220	atf-2	K08F8.2
WBGene00000221	atf-5	T04C10.4
WBGene00000222	atf-6	F45E6.2
WBGene00000223	atf-7	C07G2.2
WBGene00000238	bar-1	C54D1.6
WBGene00000383	cdc-14	C17G10.4
WBGene00000428	ceh-1	F16H11.4
WBGene00000429	ceh-2	C27A12.5
WBGene00000430	ceh-5	C16C2.1
WBGene00000431	ceh-6	K02B12.1
WBGene00000432	ceh-7	C34C6.8
WBGene00000433	ceh-8	ZK265.4
WBGene00000434	ceh-9	Y65B4BR.9
WBGene00000435	ceh-10	W03A3.1
WBGene00000436	ceh-12	F33D11.4
WBGene00000437	ceh-13	R13A5.5
WBGene00000438	ceh-14	F46C8.5
WBGene00000439	ceh-16	C13G5.1
WBGene00000440	ceh-17	D1007.1
WBGene00000441	ceh-18	ZC64.3
WBGene00000442	ceh-19	F20D12.6
WBGene00000443	ceh-20	F31E3.1
WBGene00000444	ceh-21	T26C11.6
WBGene00000445	ceh-22	F29F11.5
WBGene00000446	ceh-23	ZK652.5
WBGene00000447	ceh-24	F55B12.1
WBGene00000448	pros-1	K12H4.1
WBGene00000449	ceh-27	F46F3.1
WBGene00000450	ceh-28	K03A11.3
WBGene00000451	ceh-30	C33D12.7
WBGene00000452	ceh-31	C33D12.1
WBGene00000453	ceh-32	W05E10.3
WBGene00000454	ceh-33	C10G8.7
WBGene00000455	ceh-34	C10G8.6
WBGene00000457	ceh-36	C37E2.4
WBGene00000458	ceh-37	C37E2.5
WBGene00000459	ceh-38	F22D3.1
WBGene00000460	ceh-39	T26C11.7
WBGene00000461	ceh-40	F17A2.5
WBGene00000462	ceh-41	T26C11.5
WBGene00000463	ceh-43	C28A5.4
WBGene00000464	ceh-44	Y54F10AM.4
WBGene00000467	cep-1	F52B5.5
WBGene00000468	ces-1	F43G9.11
WBGene00000469	ces-2	ZK909.4
WBGene00000472	cey-1	F33A8.3
WBGene00000473	cey-2	F46F11.2
WBGene00000474	cey-3	M01E11.5
WBGene00000475	cey-4	Y39A1C.3
WBGene00000476	cfi-1	T23D8.8
WBGene00000483	che-1	C55B7.12
WBGene00000521	cky-1	C15C8.2
WBGene00000561	cnd-1	C34E10.7
WBGene00000584	cog-1	R03C1.3
WBGene00000793	crh-1	Y41C4A.4
WBGene00000895	dac-1	B0412.1
WBGene00000899	daf-3	F25E2.5
WBGene00000904	daf-8	R05D11.1
WBGene00000908	daf-12	F11A1.3
WBGene00000912	daf-16	R13H8.1
WBGene00000914	daf-19	F33H1.1
WBGene00000995	die-1	C18D1.1
WBGene00001029	dnj-11	F38A5.13
WBGene00001035	dnj-17	T03F6.2
WBGene00001061	dpl-1	T23G7.1
WBGene00001062	dpr-1	R10D12.2
WBGene00001092	dro-1	F53A2.5
WBGene00001096	dsc-1	C18B12.3
WBGene00001161	efl-1	Y102A5C.18
WBGene00001162	efl-2	Y48C3A.17
WBGene00001174	egl-5	C08C3.1
WBGene00001182	egl-13	T22B7.1
WBGene00001186	egl-18	F55A8.1
WBGene00001194	egl-27	C04A2.3
WBGene00001204	egl-38	C04G2.7
WBGene00001207	egl-43	R53.3
WBGene00001208	egl-44	F28B12.2
WBGene00001210	egl-46	K11G9.4
WBGene00001223	ehn-3	ZK616.10
WBGene00001249	elt-1	W09C2.1
WBGene00001250	elt-2	C33D3.1
WBGene00001251	elt-3	K02B9.4
WBGene00001252	elt-4	C39B10.6
WBGene00001253	elt-6	F52C12.5
WBGene00001310	end-1	F58E10.2
WBGene00001311	end-3	F58E10.5
WBGene00001324	eor-1	R11E3.6
WBGene00001345	fos-1	F29G9.4
WBGene00001400	fax-1	F56E3.4
WBGene00001434	fkh-2	T14G12.4
WBGene00001435	fkh-3	C29F7.4
WBGene00001436	fkh-4	C29F7.5
WBGene00001437	fkh-5	F26A1.2
WBGene00001438	fkh-6	B0286.5
WBGene00001439	fkh-7	F26D12.1
WBGene00001440	fkh-8	F40H3.4
WBGene00001441	fkh-9	K03C7.2
WBGene00001442	fkh-10	C25A1.2
WBGene00001470	flt-1	ZK783.4
WBGene00001514	xnd-1	C05D2.5
WBGene00001560	gei-3	T22H6.6
WBGene00001565	gei-8	C14B9.6
WBGene00001568	snpc-4	F32H2.1
WBGene00001574	gei-17	W10D5.3
WBGene00001707	grh-1	Y48G8AR.1
WBGene00001820	ham-1	F53B2.6
WBGene00001821	ham-2	C07A12.1
WBGene00001824	hbl-1	F13D11.2
WBGene00001851	hif-1	F38A6.3
WBGene00001867	him-8	T07G12.12
WBGene00001874	him-17	T09E8.2
WBGene00001948	hlh-1	B0304.1
WBGene00001949	hlh-2	M05B5.5
WBGene00001950	hlh-3	T24B8.6
WBGene00001951	hlh-4	T05G5.2
WBGene00001952	hlh-6	T15H9.3
WBGene00001953	hlh-8	C02B8.4
WBGene00001954	hlh-10	ZK682.4
WBGene00001955	hlh-11	F58A4.7
WBGene00001956	hlh-12	C28C12.8
WBGene00001957	hlh-13	F48D6.3
WBGene00001958	hlh-14	C18A3.8
WBGene00001959	hlh-15	C43H6.8
WBGene00001960	hlh-16	DY3.3
WBGene00001961	hlh-17	F38C2.2
WBGene00001962	hlh-19	F57C12.3
WBGene00001964	hlh-25	C17C3.7
WBGene00001965	hlh-26	C17C3.8
WBGene00001967	hlh-28	F31A3.2
WBGene00001968	hlh-29	F31A3.4
WBGene00001971	hmg-1.1	Y48B6A.14
WBGene00001972	hmg-1.2	F47D12.4
WBGene00001973	hmg-3	C32F10.5
WBGene00001974	hmg-4	T20B12.8
WBGene00001975	hmg-5	F45E4.9
WBGene00001976	hmg-11	T05A7.4
WBGene00001977	hmg-12	Y17G7A.1
WBGene00001979	hmp-2	K05C4.6
WBGene00001981	hnd-1	C44C10.8
WBGene00002004	hsf-1	Y53C10A.12
WBGene00002169	isw-1	F37A4.8
WBGene00002245	lag-1	K08B4.1
WBGene00002601	let-381	F26B1.7
WBGene00002717	let-526	C01G8.9
WBGene00002783	let-607	F57B10.1
WBGene00002987	lim-4	ZC64.4
WBGene00002988	lim-6	K03E6.1
WBGene00002989	lim-7	C04F1.3
WBGene00002990	lin-1	C37F5.1
WBGene00003000	lin-11	ZC247.3
WBGene00003002	lin-13	C03B8.4
WBGene00003003	lin-14	T25C12.1
WBGene00003008	lin-22	Y54G2A.1
WBGene00003012	lin-26	F18A1.2
WBGene00003014	lin-28	F02E9.2
WBGene00003015	lin-29	W03C9.4
WBGene00003017	lin-31	K10G6.1
WBGene00003018	lin-32	T14F9.5
WBGene00003021	lin-36	F44B9.6
WBGene00003024	lin-39	C07H6.7
WBGene00003025	lin-40	T27C4.4
WBGene00003033	lin-48	F34D10.5
WBGene00003037	lin-54	JC8.6
WBGene00003044	lir-1	F18A1.3
WBGene00003045	lir-2	F18A1.4
WBGene00003046	lir-3	F37H8.1
WBGene00003059	lpd-2	C48E7.3
WBGene00003087	lsy-2	F49H12.1
WBGene00003100	mab-3	Y53C12B.5
WBGene00003102	mab-5	C08C3.3
WBGene00003106	mab-9	T27A1.6
WBGene00003114	mab-23	C32C4.5
WBGene00003148	mbf-1	H21P03.1
WBGene00003163	mdl-1	R03E9.1
WBGene00003167	mec-3	F01D4.6
WBGene00003180	med-1	T24D3.1
WBGene00003181	med-2	K04C2.6
WBGene00003182	mef-2	W10D5.1
WBGene00003210	mel-28	C38D4.3
WBGene00003218	mep-1	M04B2.1
WBGene00003228	mex-1	W03C9.7
WBGene00003230	mex-5	W02A2.7
WBGene00003231	mex-6	AH6.5
WBGene00003233	mgl-2	F45H11.4
WBGene00003376	mls-1	H14A12.4
WBGene00003377	mls-2	C39E6.4
WBGene00003378	mml-1	T20B12.6
WBGene00003380	mnm-2	C10A4.8
WBGene00003388	moe-3	F32A11.6
WBGene00003480	klf-3	F54H5.4
WBGene00003509	mxl-1	T19B10.11
WBGene00003510	mxl-2	F40G9.11
WBGene00003511	mxl-3	F46G10.6
WBGene00003592	nfi-1	ZK1290.4
WBGene00003595	ngn-1	Y69A2AR.29
WBGene00003600	nhr-1	R09G11.2
WBGene00003601	nhr-2	C32F10.6
WBGene00003602	nhr-3	H01A20.1
WBGene00003603	nhr-4	F32B6.1
WBGene00003604	nhr-5	Y73F8A.21
WBGene00003605	nhr-6	C48D5.1
WBGene00003606	nhr-7	F54D1.4
WBGene00003607	nhr-8	F33D4.1
WBGene00003608	nhr-9	ZK418.1
WBGene00003609	nhr-10	B0280.8
WBGene00003610	nhr-11	ZC410.1
WBGene00003611	nhr-12	R04B5.4
WBGene00003612	nhr-13	Y5H2B.2
WBGene00003613	nhr-14	T01B10.4
WBGene00003614	nhr-15	F33E11.1
WBGene00003615	nhr-16	T12C9.6
WBGene00003616	nhr-17	C02B4.2
WBGene00003617	nhr-18	F44C8.3
WBGene00003618	nhr-19	E02H1.7
WBGene00003619	nhr-20	F43C1.4
WBGene00003620	nhr-21	F21D12.1
WBGene00003621	nhr-22	K06A1.4
WBGene00003622	nhr-23	C01H6.5
WBGene00003623	nhr-25	F11C1.6
WBGene00003624	nhr-28	C11G6.4
WBGene00003625	nhr-31	C26B2.3
WBGene00003626	nhr-32	K08H2.8
WBGene00003627	nhr-34	F58G6.5
WBGene00003628	nhr-35	C07A12.3
WBGene00003629	nhr-38	K01H12.3
WBGene00003630	nhr-40	T03G6.2
WBGene00003632	nhr-42	C33G8.6
WBGene00003633	nhr-43	C29E6.5
WBGene00003634	nhr-44	T19A5.4
WBGene00003635	nhr-45	F16H11.5
WBGene00003636	nhr-46	C45E5.6
WBGene00003637	nhr-47	C24G6.4
WBGene00003638	nhr-48	ZK662.3
WBGene00003639	nhr-49	K10C3.6
WBGene00003640	nhr-50	C06C6.5
WBGene00003641	nhr-51	K06B4.1
WBGene00003642	nhr-52	K06B4.2
WBGene00003643	nhr-53	K06B4.11
WBGene00003644	nhr-54	F36D3.2
WBGene00003645	nhr-55	T01G6.7
WBGene00003646	nhr-56	F44C8.6
WBGene00003647	nhr-57	T05B4.2
WBGene00003648	nhr-58	R11G11.2
WBGene00003649	nhr-59	T27B7.1
WBGene00003650	nhr-60	F57A10.5
WBGene00003651	nhr-61	W01D2.2
WBGene00003652	nhr-62	Y67A6A.2
WBGene00003653	nhr-63	C06C6.4
WBGene00003654	nhr-64	C45E1.1
WBGene00003655	nhr-65	Y17D7A.3
WBGene00003656	nhr-66	T09A12.4
WBGene00003657	nhr-67	C08F8.8
WBGene00003658	nhr-68	H12C20.3
WBGene00003659	nhr-69	T23H4.2
WBGene00003660	nhr-70	Y51A2D.17
WBGene00003661	nhr-71	K11E4.5
WBGene00003662	nhr-72	C17A2.8
WBGene00003663	nhr-73	C27C7.4
WBGene00003664	nhr-74	C27C7.3
WBGene00003667	nhr-77	T15D6.6
WBGene00003668	nhr-78	F36A4.14
WBGene00003669	nhr-79	T26H2.9
WBGene00003670	nhr-80	H10E21.3
WBGene00003671	nhr-81	C47F8.8
WBGene00003672	nhr-82	F41D3.1
WBGene00003674	nhr-84	T06C12.7
WBGene00003675	nhr-85	W05B5.3
WBGene00003676	nhr-86	Y40B10A.8
WBGene00003677	nhr-87	Y41D4B.7
WBGene00003678	nhr-88	K08A2.5
WBGene00003679	nhr-89	E03H4.13
WBGene00003680	nhr-90	ZK488.2
WBGene00003681	nhr-91	Y15E3A.1
WBGene00003682	nhr-92	Y41D4B.8
WBGene00003684	nhr-94	C12D5.8
WBGene00003685	nhr-95	Y39B6A.17
WBGene00003686	nhr-96	F44C8.11
WBGene00003687	nhr-97	H27C11.1
WBGene00003688	nhr-98	M02H5.6
WBGene00003689	nhr-99	M02H5.1
WBGene00003690	nhr-100	C28D4.1
WBGene00003691	nhr-101	H12C20.6
WBGene00003692	nhr-102	T06C12.6
WBGene00003693	nhr-103	F44C8.4
WBGene00003694	nhr-104	R11E3.5
WBGene00003695	nhr-105	C06G3.1
WBGene00003696	nhr-106	T01G6.4
WBGene00003697	nhr-107	C33G8.11
WBGene00003698	nhr-108	F35E8.12
WBGene00003699	nhr-109	T12C9.5
WBGene00003700	nhr-110	Y46H3D.5
WBGene00003701	nhr-111	F44G3.9
WBGene00003702	nhr-112	Y70C5C.6
WBGene00003703	nhr-113	ZK1025.9
WBGene00003704	nhr-114	Y45G5AM.1
WBGene00003705	nhr-115	T27B7.4
WBGene00003706	nhr-116	F09C6.9
WBGene00003707	nhr-117	F16B4.12
WBGene00003708	nhr-118	F13A2.8
WBGene00003709	nhr-119	K12H6.1
WBGene00003710	nhr-120	C25B8.6
WBGene00003711	nhr-121	E02H9.8
WBGene00003712	nhr-122	Y41D4B.9
WBGene00003713	nhr-123	M02H5.7
WBGene00003714	nhr-124	C17E7.8
WBGene00003715	nhr-125	R02D1.1
WBGene00003716	nhr-126	F44C8.10
WBGene00003717	nhr-127	T13F3.3
WBGene00003718	nhr-128	F44C8.5
WBGene00003719	nhr-129	C50B6.14
WBGene00003720	nhr-130	T01G6.8
WBGene00003721	nhr-131	T01G6.2
WBGene00003722	nhr-132	R11G11.1
WBGene00003723	nhr-133	F44C8.8
WBGene00003724	nhr-134	F44C8.2
WBGene00003725	nhr-135	VC5.5
WBGene00003726	nhr-136	C13C4.3
WBGene00003727	nhr-137	C56E10.4
WBGene00003728	nhr-138	C28D4.9
WBGene00003779	nob-1	Y75B8A.2
WBGene00003845	odd-1	B0280.4
WBGene00003846	odd-2	C34H3.2
WBGene00003847	blmp-1	F25D7.3
WBGene00003854	odr-7	T18D3.2
WBGene00003864	oma-1	C09G9.6
WBGene00003865	oma-2	ZC513.6
WBGene00003909	pag-3	F45B8.4
WBGene00003912	pal-1	C38D4.6
WBGene00003933	pat-9	T27B1.2
WBGene00003937	pax-1	K07C11.1
WBGene00003938	pax-2	K06B9.5
WBGene00003939	pax-3	F27E5.2
WBGene00003968	peb-1	T14F9.4
WBGene00003976	pes-1	T28H11.4
WBGene00004011	pha-2	M6.3
WBGene00004013	pha-4	F38A6.1
WBGene00004024	php-3	Y75B8A.1
WBGene00004027	pie-1	Y49E10.14
WBGene00004077	pop-1	W10C8.2
WBGene00004078	pos-1	F52E1.1
WBGene00004096	pqm-1	F40F8.7
WBGene00004111	pqn-21	C37A2.5
WBGene00004134	pqn-47	F59B10.1
WBGene00004157	pqn-75	W03D2.1
WBGene00004203	swsn-1	Y113G7B.23
WBGene00004319	rbr-2	ZK593.4
WBGene00004334	ref-1	T01E8.2
WBGene00004335	ref-2	C47C12.3
WBGene00004393	rnt-1	B0414.2
WBGene00004735	sbp-1	Y47D3B.7
WBGene00004745	sdc-1	F52E10.1
WBGene00004746	sdc-2	C35C5.1
WBGene00004750	sea-1	F19B10.9
WBGene00004751	sea-2	K10G6.3
WBGene00004771	sem-2	C32E12.5
WBGene00004773	sem-4	F15C11.1
WBGene00004786	sex-1	F44A6.2
WBGene00004804	skn-1	T19E7.2
WBGene00004856	sma-2	ZK370.2
WBGene00004857	sma-3	R13F6.9
WBGene00004858	sma-4	R12B2.1
WBGene00004862	sma-9	T05A10.1
WBGene00004949	sox-2	K08A8.2
WBGene00004950	sox-3	F40E10.2
WBGene00004964	spe-10	AC3.10
WBGene00005006	spr-1	D1014.8
WBGene00005008	spr-3	C07A12.5
WBGene00005009	spr-4	C09H6.1
WBGene00005011	F26F4.8	F26F4.8
WBGene00006342	sup-37	C01B7.1
WBGene00006380	tab-1	F31E8.3
WBGene00006424	ctbp-1	F49E10.5
WBGene00006445	tag-68	F37D6.6
WBGene00006462	tag-97	C33A11.4
WBGene00006471	nhr-233	Y32B12B.6
WBGene00006492	tag-146	C27A12.3
WBGene00006542	tbp-1	T20B12.2
WBGene00006543	tbx-2	F21H11.3
WBGene00006544	tbx-7	ZK328.8
WBGene00006545	tbx-8	T07C4.2
WBGene00006546	tbx-9	T07C4.6
WBGene00006547	tbx-11	F40H6.4
WBGene00006549	tbx-30	Y59E9AR.3
WBGene00006550	tbx-31	C36C9.2
WBGene00006551	tbx-32	ZK380.1
WBGene00006552	tbx-33	Y66A7A.8
WBGene00006553	tbx-34	Y47D3A.10
WBGene00006554	tbx-35	ZK177.10
WBGene00006555	tbx-36	ZK829.5
WBGene00006556	tbx-37	Y47D3A.12
WBGene00006557	tbx-38	C24H11.3
WBGene00006558	tbx-39	Y73F8A.16
WBGene00006559	tbx-40	Y73F8A.17
WBGene00006560	tbx-41	T26C11.1
WBGene00006577	tlf-1	F39H11.2
WBGene00006580	tlp-1	T23G4.1
WBGene00006604	tra-1	Y47D3A.6
WBGene00006652	ttx-1	Y113G7A.6
WBGene00006654	ttx-3	C40H5.5
WBGene00006698	uaf-2	Y116A8C.35
WBGene00006743	unc-3	Y16B4A.1
WBGene00006744	unc-4	F26C11.2
WBGene00006766	unc-30	B0564.10
WBGene00006775	unc-39	F56A12.1
WBGene00006778	unc-42	F58E6.10
WBGene00006790	unc-55	F55D12.4
WBGene00006796	unc-62	T28F12.2
WBGene00006818	unc-86	C30A5.7
WBGene00006827	unc-98	F08C6.7
WBGene00006844	unc-120	D1081.2
WBGene00006853	unc-130	C47G2.2
WBGene00006870	vab-3	F14F3.1
WBGene00006873	vab-7	M142.4
WBGene00006881	vab-15	R07B1.1
WBGene00006943	wrm-1	B0336.1
WBGene00006959	xbp-1	R74.3
WBGene00006970	zag-1	F28F9.1
WBGene00006986	zip-1	Y75B8A.35
WBGene00007042	pbrm-1	C26C6.1
WBGene00007048	nfx-1	C16A3.7
WBGene00007053	chd-7	T04D1.4
WBGene00007058	dmd-6	F13G11.1
WBGene00007063	2L52.1	2L52.1
WBGene00007094	B0019.2	B0019.2
WBGene00007105	B0035.1	B0035.1
WBGene00007223	C01F6.9	C01F6.9
WBGene00007242	madf-5	C01G12.1
WBGene00007367	nhr-150	C06B8.1
WBGene00007416	ceh-57	C07E3.5
WBGene00007417	ceh-58	C07E3.6
WBGene00007433	swsn-7	C08B11.3
WBGene00007496	npax-4	C09G9.7
WBGene00007546	nhr-153	C13C4.1
WBGene00007547	nhr-154	C13C4.2
WBGene00007645	C17E4.6	C17E4.6
WBGene00007732	spe-44	C25G4.4
WBGene00007749	ceh-79	C26E1.3
WBGene00007761	rad-26	C27B7.4
WBGene00007772	egrh-1	C27C12.2
WBGene00007776	dmd-4	C27C12.6
WBGene00007907	C34B4.2	C34B4.2
WBGene00007929	dmd-10	C34D1.1
WBGene00007930	dmd-11	C34D1.2
WBGene00007932	zip-5	C34D1.5
WBGene00007943	C34F6.9	C34F6.9
WBGene00007961	C35D6.4	C35D6.4
WBGene00007984	irx-1	C36F7.1
WBGene00008007	C38D4.7	C38D4.7
WBGene00008056	nhr-164	C41G6.5
WBGene00008081	athp-1	C44B9.4
WBGene00008092	gmeb-3	C44F1.2
WBGene00008118	madf-8	C46F11.3
WBGene00008158	nhr-165	C47F8.2
WBGene00008195	ceh-88	C49C3.5
WBGene00008208	nhr-167	C49F5.4
WBGene00008221	nhr-168	C50B6.8
WBGene00008242	ceh-75	C50H2.6
WBGene00008289	nhr-169	C54C8.1
WBGene00008309	nhr-170	C54E10.5
WBGene00008363	D1046.2	D1046.2
WBGene00008386	D1081.8	D1081.8
WBGene00008417	D2030.7	D2030.7
WBGene00008474	nhr-174	E03H4.6
WBGene00008606	dhhc-1	F09B12.2
WBGene00008619	nhr-262	F09C6.8
WBGene00008630	nhr-175	F09F3.10
WBGene00008640	F10B5.3	F10B5.3
WBGene00008683	repo-1	F11A10.2
WBGene00008762	ztf-2	F13G3.1
WBGene00008778	nhr-264	F14A5.1
WBGene00008830	nhr-176	F14H3.11
WBGene00008882	F16B12.6	F16B12.6
WBGene00008884	nhr-281	F16B12.8
WBGene00008901	nhr-27	F16H9.2
WBGene00008999	F21A10.2	F21A10.2
WBGene00009009	F21D5.4	F21D5.4
WBGene00009014	F21D5.9	F21D5.9
WBGene00009026	F21G4.5	F21G4.5
WBGene00009050	F22D6.2	F22D6.2
WBGene00009084	F23B12.7	F23B12.7
WBGene00009133	bed-3	F25H8.6
WBGene00009174	F26H9.2	F26H9.2
WBGene00009180	nurf-1	F26H11.2
WBGene00009189	F27D4.4	F27D4.4
WBGene00009190	F27D4.6	F27D4.6
WBGene00009202	aptf-4	F28C6.1
WBGene00009203	aptf-3	F28C6.2
WBGene00009231	ceh-89	F28H6.2
WBGene00009365	F33H1.4	F33H1.4
WBGene00009448	zfp-2	F35H8.3
WBGene00009461	madf-2	F36D1.1
WBGene00009508	F37D6.2	F37D6.2
WBGene00009532	ccch-1	F38B7.1
WBGene00009537	ccch-2	F38C2.5
WBGene00009539	F38C2.7	F38C2.7
WBGene00009540	hlh-31	F38C2.8
WBGene00009553	F39B2.1	F39B2.1
WBGene00009584	drap-1	F40F9.7
WBGene00009608	nhr-265	F41D3.3
WBGene00009687	F44D12.10	F44D12.10
WBGene00009743	sptf-1	F45H11.1
WBGene00009772	ztf-7	F46B6.7
WBGene00009827	hmg-6	F47G4.6
WBGene00009834	lsy-27	F47H4.1
WBGene00009899	efl-3	F49E12.6
WBGene00009923	F52B5.7	F52B5.7
WBGene00009937	lsl-1	F52F12.4
WBGene00009939	ztf-11	F52F12.6
WBGene00009965	frpr-9	F53B7.2
WBGene00009998	klf-2	F53F8.1
WBGene00010010	gmeb-2	F53H4.5
WBGene00010012	saeg-1	F53H10.2
WBGene00010086	F55B11.4	F55B11.4
WBGene00010137	ztf-26	F55H12.6
WBGene00010177	F57A8.1	F57A8.1
WBGene00010180	nhr-192	F57A8.5
WBGene00010186	nhr-283	F57A10.6
WBGene00010215	nhr-193	F57G8.6
WBGene00010251	sta-2	F58E6.1
WBGene00010264	F58G1.2	F58G1.2
WBGene00010401	H16D19.3	H16D19.3
WBGene00010410	nhr-267	H22D14.1
WBGene00010476	rnf-113	K01G5.1
WBGene00010553	K04C1.3	K04C1.3
WBGene00010600	nhr-196	K06B4.5
WBGene00010601	nhr-268	K06B4.6
WBGene00010602	nhr-197	K06B4.7
WBGene00010603	nhr-198	K06B4.8
WBGene00010604	nhr-199	K06B4.10
WBGene00010704	K09A11.1	K09A11.1
WBGene00010770	K11D2.4	K11D2.4
WBGene00010781	K11H3.4	K11H3.4
WBGene00010868	somi-1	M04G12.4
WBGene00010892	dhhc-6	M18.8
WBGene00010936	ztf-14	M163.2
WBGene00010995	ceh-90	R03E1.4
WBGene00011002	nhr-205	R04B5.3
WBGene00011066	ztf-15	R06C7.9
WBGene00011069	ceh-62	R06F6.6
WBGene00011097	nhr-206	R07B7.13
WBGene00011098	nhr-207	R07B7.14
WBGene00011099	nhr-208	R07B7.15
WBGene00011100	nhr-209	R07B7.16
WBGene00011113	R07E5.5	R07E5.5
WBGene00011130	zip-6	R07H5.10
WBGene00011150	nhr-269	R08H2.9
WBGene00011206	R10E4.11	R10E4.11
WBGene00011259	miz-1	R13.4
WBGene00011315	mbr-1	T01C1.2
WBGene00011327	hlh-34	T01D3.2
WBGene00011376	gla-3	T02E1.3
WBGene00011396	nhr-271	T03E6.3
WBGene00011505	pzf-1	T05G11.1
WBGene00011520	nhr-213	T06C12.13
WBGene00011547	T06G6.5	T06G6.5
WBGene00011565	nhr-272	T07C5.2
WBGene00011566	nhr-214	T07C5.3
WBGene00011567	nhr-215	T07C5.4
WBGene00011568	nhr-26	T07C5.5
WBGene00011575	madf-4	T07C12.11
WBGene00011583	T07D10.3	T07D10.3
WBGene00011597	zim-1	T07G12.6
WBGene00011600	zim-2	T07G12.10
WBGene00011601	zim-3	T07G12.11
WBGene00011614	nfya-1	T08D10.1
WBGene00011626	T08G5.7	T08G5.7
WBGene00011639	ztf-17	T09A5.12
WBGene00011651	nhr-217	T09E11.2
WBGene00011661	ztf-27	T09F3.1
WBGene00011696	eea-1	T10G3.5
WBGene00011722	T11G6.8	T11G6.8
WBGene00011729	set-16	T12D8.1
WBGene00011750	nhr-218	T13F3.2
WBGene00011824	T18D3.7	T18D3.7
WBGene00011924	T22C8.3	T22C8.3
WBGene00011925	T22C8.4	T22C8.4
WBGene00011926	sptf-2	T22C8.5
WBGene00011956	T23F11.4	T23F11.4
WBGene00011964	saeg-2	T23G5.6
WBGene00012005	2018-06-01	T24H10.7
WBGene00012050	nhr-223	T26E4.8
WBGene00012056	nhr-285	T26E4.16
WBGene00012074	T27A8.2	T27A8.2
WBGene00012101	zip-10	T27F2.4
WBGene00012209	hmg-20	W02D9.3
WBGene00012243	W04D2.4	W04D2.4
WBGene00012277	ccch-3	W05B10.2
WBGene00012317	ztf-6	W06H12.1
WBGene00012330	zip-3	W07G1.3
WBGene00012385	Y5F2A.4	Y5F2A.4
WBGene00012405	ztf-25	Y6G8.3
WBGene00012435	flh-1	Y11D7A.12
WBGene00012436	flh-3	Y11D7A.13
WBGene00012446	nhr-230	Y17D7A.1
WBGene00012449	nhr-231	Y17D7B.1
WBGene00012473	Y17G7B.22	Y17G7B.22
WBGene00012474	attf-6	Y18D10A.1
WBGene00012494	nhr-232	Y22F5A.1
WBGene00012584	ceh-100	Y38E10A.6
WBGene00012596	nhr-234	Y38E10A.18
WBGene00012639	fezf-1	Y38H8A.5
WBGene00012644	rabx-5	Y39A1A.5
WBGene00012674	bed-1	Y39B6A.12
WBGene00012702	ztf-20	Y39B6A.46
WBGene00012703	nhr-145	Y39B6A.47
WBGene00012715	snpc-1.2	Y39E4B.2
WBGene00012735	sptf-3	Y40B1A.4
WBGene00012832	dmd-3	Y43F8C.10
WBGene00012854	Y44A6D.3	Y44A6D.3
WBGene00012943	bed-2	Y47D3B.9
WBGene00012976	sup-35	Y48A6C.3
WBGene00012988	ztf-22	Y48C3A.4
WBGene00012994	Y48C3A.12	Y48C3A.12
WBGene00013006	lin-38	Y48E1B.7
WBGene00013055	Y50E8A.12	Y50E8A.12
WBGene00013096	mcd-1	Y51H1A.6
WBGene00013100	zip-7	Y51H4A.4
WBGene00013111	sta-1	Y51H4A.17
WBGene00013128	dox-1	Y52B11A.9
WBGene00013147	eyg-1	Y53C12C.1
WBGene00013150	Y53F4B.3	Y53F4B.3
WBGene00013152	Y53F4B.5	Y53F4B.5
WBGene00013178	Y53H1A.2	Y53H1A.2
WBGene00013236	Y56A3A.18	Y56A3A.18
WBGene00013240	Y56A3A.28	Y56A3A.28
WBGene00013270	Y57A10A.31	Y57A10A.31
WBGene00013319	ccch-5	Y57G11C.25
WBGene00013350	slr-2	Y59A8B.13
WBGene00013370	Y60A9.3	Y60A9.3
WBGene00013383	aptf-2	Y62E10A.17
WBGene00013425	ceh-91	Y66A7A.5
WBGene00013438	ztf-29	Y66D12A.12
WBGene00013465	Y67H2A.10	Y67H2A.10
WBGene00013483	nhr-241	Y69H2.8
WBGene00013505	Y71A12B.8	Y71A12B.8
WBGene00013512	nhr-276	Y71A12C.1
WBGene00013543	Y75B8A.6	Y75B8A.6
WBGene00013560	zip-12	Y75B8A.29
WBGene00013580	Y79H2A.3	Y79H2A.3
WBGene00013583	ceh-51	Y80D3A.3
WBGene00013584	nhr-243	Y80D3A.4
WBGene00013595	atg-4.1	Y87G2A.3
WBGene00013639	Y105C5A.15	Y105C5A.15
WBGene00013665	hlh-32	Y105C5B.29
WBGene00013676	ekl-4	Y105E8A.17
WBGene00013717	madf-10	Y106G6H.4
WBGene00013734	Y111B2A.10	Y111B2A.10
WBGene00013794	dct-13	Y116A8C.17
WBGene00013795	nhr-229	Y116A8C.18
WBGene00013796	Y116A8C.19	Y116A8C.19
WBGene00013797	Y116A8C.20	Y116A8C.20
WBGene00013799	athp-3	Y116A8C.22
WBGene00013859	ZC247.1	ZC247.1
WBGene00013876	ceh-74	ZC376.4
WBGene00013878	atfs-1	ZC376.7
WBGene00013940	nhr-248	ZK218.6
WBGene00013966	ztf-9	ZK287.6
WBGene00013970	ZK337.2	ZK337.2
WBGene00013976	nhr-33	ZK455.6
WBGene00014060	ZK673.4	ZK673.4
WBGene00014068	nhr-255	ZK678.2
WBGene00014131	sdz-38	ZK892.7
WBGene00014189	nhr-245	ZK1025.10
WBGene00014192	nhr-246	ZK1037.4
WBGene00014193	nhr-247	ZK1037.5
WBGene00014208	ZK1067.2	ZK1067.2
WBGene00015091	B0261.1	B0261.1
WBGene00015138	B0310.2	B0310.2
WBGene00015143	B0336.3	B0336.3
WBGene00015147	B0336.7	B0336.7
WBGene00015285	gmeb-1	C01B12.2
WBGene00015352	C02F5.12	C02F5.12
WBGene00015355	C02F12.5	C02F12.5
WBGene00015395	nhr-147	C03G6.8
WBGene00015396	nhr-148	C03G6.10
WBGene00015397	nhr-149	C03G6.12
WBGene00015447	srab-2	C04F5.5
WBGene00015451	C04F5.9	C04F5.9
WBGene00015468	madf-11	C05D2.6
WBGene00015477	attf-4	C05D10.1
WBGene00015497	nhr-76	C05G6.1
WBGene00015507	C06A6.2	C06A6.2
WBGene00015523	ztf-30	C06E1.8
WBGene00015527	C06E2.1	C06E2.1
WBGene00015620	C08G9.2	C08G9.2
WBGene00015649	C09F5.3	C09F5.3
WBGene00015651	ceh-53	C09G12.1
WBGene00015705	nhr-152	C12D5.2
WBGene00015716	sox-4	C12D12.5
WBGene00015758	nhr-155	C14C6.4
WBGene00015809	C16A3.4	C16A3.4
WBGene00015869	nhr-257	C17A2.1
WBGene00015897	nhr-156	C17E7.1
WBGene00015900	nhr-157	C17E7.5
WBGene00015901	nhr-158	C17E7.6
WBGene00015902	nhr-159	C17E7.7
WBGene00015934	ceh-48	C17H12.9
WBGene00015981	elt-7	C18G1.2
WBGene00016029	elf-1	C24A1.2
WBGene00016091	nhr-30	C25E10.1
WBGene00016126	nhr-258	C26B2.4
WBGene00016138	flh-2	C26E6.2
WBGene00016154	C27A12.2	C27A12.2
WBGene00016162	crh-2	C27D6.4
WBGene00016189	C28G1.4	C28G1.4
WBGene00016200	dpff-1	C28H8.9
WBGene00016233	srt-58	C29G2.5
WBGene00016269	C30G4.4	C30G4.4
WBGene00016364	nhr-161	C33G8.7
WBGene00016365	nhr-139	C33G8.8
WBGene00016366	nhr-140	C33G8.9
WBGene00016367	nhr-162	C33G8.10
WBGene00016368	nhr-163	C33G8.12
WBGene00016383	C33H5.17	C33H5.17
WBGene00016407	C34D10.2	C34D10.2
WBGene00016517	nhr-260	C38C3.9
WBGene00016557	ceh-84	C40D2.4
WBGene00016600	ets-5	C42D8.4
WBGene00016712	C46E10.8	C46E10.8
WBGene00016713	C46E10.9	C46E10.9
WBGene00016754	cebp-2	C48E7.11
WBGene00016772	nhr-166	C49D10.2
WBGene00016777	nhr-261	C49D10.9
WBGene00016798	ets-8	C50A2.4
WBGene00016865	ets-9	C52B9.2
WBGene00016888	C52E12.1	C52E12.1
WBGene00016890	lst-5	C52E12.6
WBGene00016905	ztf-3	C53D5.4
WBGene00016926	nhr-171	C54F6.8
WBGene00016927	nhr-172	C54F6.9
WBGene00016930	madf-6	C54G6.1
WBGene00016948	scrt-1	C55C2.1
WBGene00016975	nhr-173	C56E10.1
WBGene00016997	cebp-1	D1005.3
WBGene00017088	akir-1	E01A2.6
WBGene00017198	nhr-36	F07C3.10
WBGene00017317	attf-2	F09G2.9
WBGene00017326	dmd-5	F10C1.5
WBGene00017352	F10E7.11	F10E7.11
WBGene00017406	sdz-12	F12E12.5
WBGene00017423	F13C5.2	F13C5.2
WBGene00017430	F13H6.1	F13H6.1
WBGene00017482	set-9	F15E6.1
WBGene00017503	nhr-177	F16B4.1
WBGene00017510	nhr-178	F16B4.9
WBGene00017512	nhr-179	F16B4.11
WBGene00017535	atf-8	F17A9.3
WBGene00017538	ceh-49	F17A9.6
WBGene00017598	F19F10.1	F19F10.1
WBGene00017601	ets-7	F19F10.5
WBGene00017651	F21A9.2	F21A9.2
WBGene00017664	npax-1	F21D12.5
WBGene00017687	ets-4	F22A3.1
WBGene00017690	ceh-60	F22A3.5
WBGene00017733	ubxn-1	F23C8.4
WBGene00017742	nfyc-1	F23F1.1
WBGene00017755	zip-8	F23F12.9
WBGene00017787	nhr-141	F25E5.6
WBGene00017814	F26A10.2	F26A10.2
WBGene00017961	nhr-180	F31F4.12
WBGene00017967	ada-2	F32A5.1
WBGene00018022	ceh-87	F34D6.2
WBGene00018099	ztf-28	F36F12.8
WBGene00018140	F37B4.10	F37B4.10
WBGene00018189	nhr-181	F38H12.3
WBGene00018248	F40G9.14	F40G9.14
WBGene00018265	nhr-182	F41B5.9
WBGene00018266	nhr-183	F41B5.10
WBGene00018355	ceh-86	F42G2.6
WBGene00018404	nhr-39	F44A2.4
WBGene00018412	nhr-37	F44C4.2
WBGene00018415	nhr-184	F44C8.9
WBGene00018420	F44E2.7	F44E2.7
WBGene00018430	nhr-142	F44E7.8
WBGene00018432	irld-33	F45C12.1
WBGene00018433	ceh-82	F45C12.2
WBGene00018434	ceh-81	F45C12.3
WBGene00018446	ceh-83	F45C12.15
WBGene00018539	nhr-185	F47C10.1
WBGene00018541	nhr-186	F47C10.3
WBGene00018542	nhr-187	F47C10.4
WBGene00018544	nhr-188	F47C10.7
WBGene00018545	nhr-189	F47C10.8
WBGene00018567	F47E1.3	F47E1.3
WBGene00018591	npax-2	F48B9.5
WBGene00018622	nhr-190	F48G7.11
WBGene00018636	F49E8.2	F49E8.2
WBGene00018704	ztf-13	F52E4.8
WBGene00018740	tra-4	F53B3.1
WBGene00018786	hmbx-1	F54A5.1
WBGene00018794	attf-3	F54C4.3
WBGene00018833	ztf-1	F54F2.5
WBGene00018836	F54F2.9	F54F2.9
WBGene00018959	F56D1.1	F56D1.1
WBGene00018990	klf-1	F56F11.3
WBGene00019011	F57C9.4	F57C9.4
WBGene00019115	nhr-195	F59E11.10
WBGene00019116	nhr-143	F59E11.11
WBGene00019217	athp-2	H20J04.2
WBGene00019218	madf-3	H20J04.3
WBGene00019299	K02D7.2	K02D7.2
WBGene00019327	zip-2	K02F3.4
WBGene00019347	mbl-1	K02H8.1
WBGene00019407	K05F1.5	K05F1.5
WBGene00019424	aptf-1	K06A1.1
WBGene00019521	dmd-7	K08B12.2
WBGene00019598	K09H9.7	K09H9.7
WBGene00019611	K10B3.5	K10B3.5
WBGene00019629	cid-1	K10D2.3
WBGene00019651	K11D12.12	K11D12.12
WBGene00019691	K12H6.12	K12H6.12
WBGene00019741	nhr-201	M02H5.3
WBGene00019742	nhr-202	M02H5.4
WBGene00019743	nhr-203	M02H5.5
WBGene00019751	M03D4.4	M03D4.4
WBGene00019816	nhr-204	R02C2.4
WBGene00019824	R02D3.7	R02D3.7
WBGene00019864	ceh-93	R04A9.5
WBGene00019878	R05D3.3	R05D3.3
WBGene00019883	met-2	R05D3.11
WBGene00019960	ztf-16	R08E3.4
WBGene00020015	nhr-210	R11G11.12
WBGene00020062	nhr-270	R13D11.8
WBGene00020093	R144.3	R144.3
WBGene00020111	R151.8	R151.8
WBGene00020152	nhr-211	T01G6.5
WBGene00020153	nhr-212	T01G6.6
WBGene00020214	attf-5	T04G9.1
WBGene00020251	camt-1	T05C1.4
WBGene00020320	T07F8.4	T07F8.4
WBGene00020368	ast-1	T08H4.3
WBGene00020385	nhr-216	T09D3.4
WBGene00020399	ztf-4	T10B11.3
WBGene00020408	T10D4.6	T10D4.6
WBGene00020460	nhr-273	T12C9.1
WBGene00020485	ceh-54	T13C5.4
WBGene00020555	nhr-219	T19A5.5
WBGene00020630	T20F7.1	T20F7.1
WBGene00020635	T20H4.2	T20H4.2
WBGene00020694	dhhc-11	T22E7.2
WBGene00020708	dmd-8	T22H9.4
WBGene00020748	nhr-221	T24A6.8
WBGene00020750	nhr-222	T24A6.11
WBGene00020763	ztf-18	T24C4.7
WBGene00020823	T26A5.8	T26A5.8
WBGene00020827	T26A8.4	T26A8.4
WBGene00020849	nhr-225	T27B7.2
WBGene00020850	nhr-226	T27B7.3
WBGene00020851	nhr-227	T27B7.5
WBGene00020852	nhr-228	T27B7.6
WBGene00020898	T28D9.9	T28D9.9
WBGene00020930	hlh-30	W02C12.3
WBGene00020942	W02D7.6	W02D7.6
WBGene00020961	sknr-1	W02H5.7
WBGene00021000	W03F9.2	W03F9.2
WBGene00021019	W04B5.2	W04B5.2
WBGene00021047	zfp-3	W05H7.4
WBGene00021082	zip-11	W08E12.1
WBGene00021132	nfyb-1	W10D9.4
WBGene00021163	nhr-275	Y5H2A.2
WBGene00021254	Y22D7AL.16	Y22D7AL.16
WBGene00021374	Y37E11B.1	Y37E11B.1
WBGene00021387	Y37F4.6	Y37F4.6
WBGene00021446	hlh-33	Y39A3CR.6
WBGene00021522	nhr-274	Y41D4B.21
WBGene00021525	Y41D4B.26	Y41D4B.26
WBGene00021538	rabs-5	Y42H9AR.3
WBGene00021552	zip-4	Y44E3B.1
WBGene00021610	nhr-237	Y46H3D.6
WBGene00021611	nhr-238	Y46H3D.7
WBGene00021637	Y47G6A.7	Y47G6A.7
WBGene00021679	Y48G1C.6	Y48G1C.6
WBGene00021689	Y48G8AL.10	Y48G8AL.10
WBGene00021704	Y48G9A.11	Y48G9A.11
WBGene00021816	Y53G8AR.9	Y53G8AR.9
WBGene00021846	ztf-23	Y54E10BR.8
WBGene00021848	nhr-239	Y54F10AM.1
WBGene00021924	Y55F3AM.6	Y55F3AM.6
WBGene00021931	Y55F3AM.14	Y55F3AM.14
WBGene00021942	madf-1	Y55F3BR.5
WBGene00022000	tbx-42	Y59E9AR.5
WBGene00022042	icd-2	Y65B4BR.5
WBGene00022060	dmd-9	Y67D8A.3
WBGene00022097	nhr-242	Y69A2AR.26
WBGene00022182	swsn-3	Y71H2AM.17
WBGene00022207	elk-2	Y73B3A.5
WBGene00022268	Y73E7A.1	Y73E7A.1
WBGene00022278	rcor-1	Y74C9A.4
WBGene00022334	Y82E9BR.1	Y82E9BR.1
WBGene00022349	Y82E9BR.17	Y82E9BR.17
WBGene00022374	nhr-277	Y94H6A.1
WBGene00022388	Y95B8A.8	Y95B8A.8
WBGene00022423	nhr-41	Y104H12A.1
WBGene00022500	lfi-1	ZC8.4
WBGene00022518	zfh-2	ZC123.3
WBGene00022554	duxl-1	ZC204.2
WBGene00022592	ZC328.2	ZC328.2
WBGene00022598	ztf-8	ZC395.8
WBGene00022608	madf-9	ZC416.1
WBGene00022637	nhr-252	ZK6.2
WBGene00022639	nhr-253	ZK6.4
WBGene00022640	nhr-254	ZK6.5
WBGene00022671	ZK177.3	ZK177.3
WBGene00022681	ZK185.1	ZK185.1
WBGene00022756	nhr-251	ZK488.4
WBGene00022762	ZK546.5	ZK546.5
WBGene00022785	ZK652.6	ZK652.6
WBGene00022794	snu-23	ZK686.4
WBGene00022795	ZK686.5	ZK686.5
WBGene00022805	nhr-256	ZK697.2
WBGene00022837	ceh-45	ZK993.1
WBGene00022861	dve-1	ZK1193.5
WBGene00023497	lin-15B	ZK662.4
WBGene00043056	nfya-2	Y53H1A.5
WBGene00043705	egrh-2	Y55F3AM.7
WBGene00044032	ceh-99	T21B4.17
WBGene00044068	syd-9	ZK867.1
WBGene00044071	dhhc-14	D2021.2
WBGene00044330	alr-1	R08B4.2
WBGene00044386	C27A2.7	C27A2.7
WBGene00044390	ZK177.11	ZK177.11
WBGene00044508	nsy-7	C18F3.4
WBGene00044651	egrh-3	Y94H6A.11
WBGene00044689	arid-1	Y108G3AL.7
WBGene00044791	bnc-1	F55C5.11
WBGene00044798	tbx-43	Y46E12A.4
WBGene00045215	ceh-63	C02F12.10
WBGene00045419	lsy-12	R07B5.9
WBGene00045515	ZK1037.13	ZK1037.13
WBGene00077521	maf-1	F45H11.6
