# Supplementary material for: The C. elegans embryonic transcriptome with tissue, time, and alternative splicing resolution
Source: Genome Res. 2019 Jun;29(6):1036–45. doi: 10.1101/gr.243394.118 (PMC6581053; doi:10.1101/gr.243394.118)
Supplement: Supplemental Material [file supp_gr.243394.118_Supplemental_Table_S20.xlsx]

## Sheet: SraRunTable
# Warner et al., 2018 - Description of data sets
# NextSeq 500 C. elegans RNA-seq Paired end reads
# BioProject PRJNA477006, SRA Study SRP151477
# sample_type: bulk isolated, sex: hermaphrodite, tissue: FACS sorted embryonic cells
BioSample	Experiment	Library_Name	Number of Spots	MBases	MBytes	Run	SRA_Sample	Sample_Name	age	cell_type	replicate
SAMN09466712	SRX4314203	hlh1rep3T1	19285171	2758	627	SRR7443586	SRS3473373	hlh1rep3T1	1	muscle	3
SAMN09466717	SRX4314202	hlh1rep4T1	12007817	1717	462	SRR7443587	SRS3473372	hlh1rep4T1	1	muscle	4
SAMN09466718	SRX4314201	hlh1rep4T2	11974091	1712	445	SRR7443588	SRS3473371	hlh1rep4T2	2	muscle	4
SAMN09466715	SRX4314200	hlh1rep3T4	20929769	2994	648	SRR7443589	SRS3473370	hlh1rep3T4	4	muscle	3
SAMN09466716	SRX4314199	hlh1rep4T0	13050937	1866	496	SRR7443590	SRS3473369	hlh1rep4T0	0	muscle	4
SAMN09466719	SRX4314198	hlh1rep4T3	11035531	1578	404	SRR7443591	SRS3473368	hlh1rep4T3	3	muscle	4
SAMN09466720	SRX4314197	hlh1rep4T4	12592981	1801	460	SRR7443592	SRS3473367	hlh1rep4T4	4	muscle	4
SAMN09466735	SRX4314196	pha4rep1T4	13538410	1936	417	SRR7443593	SRS3473366	pha4rep1T4	4	pharynx	1
SAMN09466740	SRX4314195	pha4rep2T4	12348962	1766	372	SRR7443594	SRS3473365	pha4rep2T4	4	pharynx	2
SAMN09466691	SRX4314194	end1rep1T0	16585947	2372	510	SRR7443595	SRS3473364	end1rep1T0	0	intestine	1
SAMN09466692	SRX4314193	end1rep1T1	18747167	2681	591	SRR7443596	SRS3473363	end1rep1T1	1	intestine	1
SAMN09466693	SRX4314192	end1rep1T2	11576254	1655	356	SRR7443597	SRS3473362	end1rep1T2	2	intestine	1
SAMN09466694	SRX4314191	end1rep1T3	13436870	1922	419	SRR7443598	SRS3473361	end1rep1T3	3	intestine	1
SAMN09466695	SRX4314190	end1rep1T4	13710289	1961	431	SRR7443599	SRS3473360	end1rep1T4	4	intestine	1
SAMN09466696	SRX4314189	end1rep2T0	10372209	1483	284	SRR7443600	SRS3473359	end1rep2T0	0	intestine	2
SAMN09466697	SRX4314188	end1rep2T1	14806355	2118	446	SRR7443601	SRS3473358	end1rep2T1	1	intestine	2
SAMN09466698	SRX4314187	end1rep2T2	10141278	1450	308	SRR7443602	SRS3473357	end1rep2T2	2	intestine	2
SAMN09466699	SRX4314186	end1rep2T3	13460067	1925	399	SRR7443603	SRS3473356	end1rep2T3	3	intestine	2
SAMN09466700	SRX4314185	end1rep2T4	12954522	1853	388	SRR7443604	SRS3473355	end1rep2T4	4	intestine	2
SAMN09466726	SRX4314184	nhr25rep2T0	20922586	2992	783	SRR7443605	SRS3473354	nhr25rep2T0	0	hypodermis	2
SAMN09466730	SRX4314183	nhr25rep2T4	19069854	2727	663	SRR7443606	SRS3473353	nhr25rep2T4	4	hypodermis	2
SAMN09466736	SRX4314182	pha4rep2T0	11817769	1690	424	SRR7443607	SRS3473352	pha4rep2T0	0	pharynx	2
SAMN09466725	SRX4314181	nhr25rep1T4	12169033	1740	415	SRR7443608	SRS3473351	nhr25rep1T4	4	hypodermis	1
SAMN09466749	SRX4314180	tbx37rep2T3	19367373	2770	617	SRR7443609	SRS3473350	tbx37rep2T3	3	ABa cell lineage	2
SAMN09466753	SRX4314179	tbx37rep3T2	14327531	2049	539	SRR7443610	SRS3473349	tbx37rep3T2	2	ABa cell lineage	3
SAMN09466754	SRX4314178	tbx37rep3T3	13014433	1861	476	SRR7443611	SRS3473348	tbx37rep3T3	3	ABa cell lineage	3
SAMN09466751	SRX4314177	tbx37rep3T0	12879473	1842	492	SRR7443612	SRS3473347	tbx37rep3T0	0	ABa cell lineage	3
SAMN09466743	SRX4314176	tbx37rep1T2	11249693	1609	353	SRR7443613	SRS3473346	tbx37rep1T2	2	ABa cell lineage	1
SAMN09466733	SRX4314175	pha4rep1T2	12404967	1774	412	SRR7443614	SRS3473345	pha4rep1T2	2	pharynx	1
SAMN09466746	SRX4314174	tbx37rep2T0	18729084	2679	612	SRR7443615	SRS3473344	tbx37rep2T0	0	ABa cell lineage	2
SAMN09466745	SRX4314173	tbx37rep1T4	7974564	1140	238	SRR7443616	SRS3473342	tbx37rep1T4	4	ABa cell lineage	1
SAMN09466734	SRX4314172	pha4rep1T3	12474375	1784	381	SRR7443617	SRS3473343	pha4rep1T3	3	pharynx	1
SAMN09466678	SRX4314171	ceh32rep2T2	6252703	894	247	SRR7443618	SRS3473377	ceh32rep2T2	2	ABala cell lineage	2
SAMN09466711	SRX4314204	hlh1rep3T0	31322755	4480	1023	SRR7443585	SRS3473374	hlh1rep3T0	0	muscle	3
SAMN09466714	SRX4314205	hlh1rep3T3	22809773	3262	713	SRR7443584	SRS3473375	hlh1rep3T3	3	muscle	3
SAMN09466713	SRX4314206	hlh1rep3T2	17789818	2544	566	SRR7443583	SRS3473376	hlh1rep3T2	2	muscle	3
SAMN09466677	SRX4314170	ceh32rep2T1	6929309	991	287	SRR7443619	SRS3473339	ceh32rep2T1	1	ABala cell lineage	2
SAMN09466676	SRX4314169	ceh32rep2T0	11854081	1695	470	SRR7443620	SRS3473340	ceh32rep2T0	0	ABala cell lineage	2
SAMN09466675	SRX4314168	ceh32rep1T4	6216876	889	236	SRR7443621	SRS3473341	ceh32rep1T4	4	ABala cell lineage	1
SAMN09466674	SRX4314167	ceh32rep1T3	9953132	1423	364	SRR7443622	SRS3473338	ceh32rep1T3	3	ABala cell lineage	1
SAMN09466673	SRX4314166	ceh32rep1T2	10373282	1483	436	SRR7443623	SRS3473337	ceh32rep1T2	2	ABala cell lineage	1
SAMN09466672	SRX4314165	ceh32rep1T1	10121304	1447	411	SRR7443624	SRS3473336	ceh32rep1T1	1	ABala cell lineage	1
SAMN09466671	SRX4314164	ceh32rep1T0	11559412	1653	510	SRR7443625	SRS3473335	ceh32rep1T0	0	ABala cell lineage	1
SAMN09466729	SRX4314163	nhr25rep2T3	13293078	1901	474	SRR7443626	SRS3473334	nhr25rep2T3	3	hypodermis	2
SAMN09466742	SRX4314162	tbx37rep1T1	11875825	1698	403	SRR7443627	SRS3473333	tbx37rep1T1	1	ABa cell lineage	1
SAMN09466680	SRX4314161	ceh32rep2T4	6330570	905	244	SRR7443628	SRS3473331	ceh32rep2T4	4	ABala cell lineage	2
SAMN09466679	SRX4314160	ceh32rep2T3	13053178	1867	505	SRR7443629	SRS3473332	ceh32rep2T3	3	ABala cell lineage	2
SAMN09466722	SRX4314159	nhr25rep1T1	14374369	2056	506	SRR7443630	SRS3473330	nhr25rep1T1	1	hypodermis	1
SAMN09466721	SRX4314158	nhr25rep1T0	16958972	2426	605	SRR7443631	SRS3473329	nhr25rep1T0	0	hypodermis	1
SAMN09466724	SRX4314157	nhr25rep1T3	11642408	1665	395	SRR7443632	SRS3473328	nhr25rep1T3	3	hypodermis	1
SAMN09466723	SRX4314156	nhr25rep1T2	12441956	1779	440	SRR7443633	SRS3473327	nhr25rep1T2	2	hypodermis	1
SAMN09466690	SRX4314155	cnd1rep2T4	13694640	1959	482	SRR7443634	SRS3473325	cnd1rep2T4	4	neuron	2
SAMN09466689	SRX4314154	cnd1rep2T3	17560580	2512	589	SRR7443635	SRS3473326	cnd1rep2T3	3	neuron	2
SAMN09466728	SRX4314153	nhr25rep2T2	17703843	2532	639	SRR7443636	SRS3473324	nhr25rep2T2	2	hypodermis	2
SAMN09466727	SRX4314152	nhr25rep2T1	21538451	3081	789	SRR7443637	SRS3473322	nhr25rep2T1	1	hypodermis	2
SAMN09466686	SRX4314151	cnd1rep2T0	12710795	1818	411	SRR7443638	SRS3473321	cnd1rep2T0	0	neuron	2
SAMN09466685	SRX4314150	cnd1rep1T4	16383663	2343	589	SRR7443639	SRS3473323	cnd1rep1T4	4	neuron	1
SAMN09466688	SRX4314149	cnd1rep2T2	20051586	2868	781	SRR7443640	SRS3473320	cnd1rep2T2	2	neuron	2
SAMN09466687	SRX4314148	cnd1rep2T1	14474446	2070	457	SRR7443641	SRS3473319	cnd1rep2T1	1	neuron	2
SAMN09466682	SRX4314147	cnd1rep1T1	11199812	1602	434	SRR7443642	SRS3473318	cnd1rep1T1	1	neuron	1
SAMN09466681	SRX4314146	cnd1rep1T0	17900851	2560	720	SRR7443643	SRS3473316	cnd1rep1T0	0	neuron	1
SAMN09466684	SRX4314145	cnd1rep1T3	26145508	3740	874	SRR7443644	SRS3473317	cnd1rep1T3	3	neuron	1
SAMN09466683	SRX4314144	cnd1rep1T2	16869647	2413	603	SRR7443645	SRS3473315	cnd1rep1T2	2	neuron	1
SAMN09466708	SRX4314143	hlh1rep2T2	10010313	1431	321	SRR7443646	SRS3473314	hlh1rep2T2	2	muscle	2
SAMN09466707	SRX4314142	hlh1rep2T1	15187568	2172	474	SRR7443647	SRS3473313	hlh1rep2T1	1	muscle	2
SAMN09466706	SRX4314141	hlh1rep2T0	10977170	1570	351	SRR7443648	SRS3473312	hlh1rep2T0	0	muscle	2
SAMN09466705	SRX4314140	hlh1rep1T4	13646014	1836	567	SRR7443649	SRS3473311	hlh1rep1T4	4	muscle	1
SAMN09466704	SRX4314139	hlh1rep1T3	11641207	1502	516	SRR7443650	SRS3473310	hlh1rep1T3	3	muscle	1
SAMN09466703	SRX4314138	hlh1rep1T2	8101019	986	382	SRR7443651	SRS3473309	hlh1rep1T2	2	muscle	1
SAMN09466702	SRX4314137	hlh1rep1T1	12948584	1820	469	SRR7443652	SRS3473308	hlh1rep1T1	1	muscle	1
SAMN09466701	SRX4314136	hlh1rep1T0	17173148	2405	661	SRR7443653	SRS3473307	hlh1rep1T0	0	muscle	1
SAMN09466737	SRX4314135	pha4rep2T1	9085779	1299	275	SRR7443654	SRS3473306	pha4rep2T1	1	pharynx	2
SAMN09466710	SRX4314134	hlh1rep2T4	10997607	1573	295	SRR7443655	SRS3473305	hlh1rep2T4	4	muscle	2
SAMN09466709	SRX4314133	hlh1rep2T3	8245555	1179	261	SRR7443656	SRS3473304	hlh1rep2T3	3	muscle	2
SAMN09466744	SRX4314132	tbx37rep1T3	10384311	1485	341	SRR7443657	SRS3473303	tbx37rep1T3	3	ABa cell lineage	1
SAMN09466731	SRX4314131	pha4rep1T0	13027070	1863	427	SRR7443658	SRS3473302	pha4rep1T0	0	pharynx	1
SAMN09466755	SRX4314130	tbx37rep3T4	14820325	2120	526	SRR7443659	SRS3473301	tbx37rep3T4	4	ABa cell lineage	3
SAMN09466741	SRX4314129	tbx37rep1T0	11198277	1601	371	SRR7443660	SRS3473300	tbx37rep1T0	0	ABa cell lineage	1
SAMN09466752	SRX4314128	tbx37rep3T1	11152740	1595	434	SRR7443661	SRS3473299	tbx37rep3T1	1	ABa cell lineage	3
SAMN09466739	SRX4314127	pha4rep2T3	7620629	1090	196	SRR7443662	SRS3473298	pha4rep2T3	3	pharynx	2
SAMN09466748	SRX4314126	tbx37rep2T2	26549135	3797	881	SRR7443663	SRS3473297	tbx37rep2T2	2	ABa cell lineage	2
SAMN09466738	SRX4314125	pha4rep2T2	10025842	1434	345	SRR7443664	SRS3473296	pha4rep2T2	2	pharynx	2
SAMN09466732	SRX4314124	pha4rep1T1	12202746	1745	406	SRR7443665	SRS3473295	pha4rep1T1	1	pharynx	1
SAMN09466750	SRX4314123	tbx37rep2T4	22639766	3238	704	SRR7443666	SRS3473294	tbx37rep2T4	4	ABa cell lineage	2
SAMN09466747	SRX4314122	tbx37rep2T1	29177009	4173	977	SRR7443667	SRS3473293	tbx37rep2T1	1	ABa cell lineage	2
