# Supplementary material for: The C. elegans embryonic transcriptome with tissue, time, and alternative splicing resolution
Source: HighWire-hosted journal article supplement (doi:10.1101/gr.243394.118), 2019-05-23
Supplement: Supplemental_Code.zip [file Script_Descriptions.xlsx]

## Sheet: Sheet1
Script Name	Purpose
Supplemental_Run_Qorts.sh	shell script: run QoRTs to count alignments by gene, exon, andsplice junction for DESeq2 and JunctionSeq
Supplemental_Run_Qorts_Mergenovelsj.sh	shell script: run QoRTs to merge novel splice junctions for JunctionSeq
Supplemental_Run_Deseq2_Analyze_Diffexpress.sh	shell script: run DESeq2 for differential expression analysis
Supplemental_Deseq2_Analyze_Diffexpress.R	R script: run DESeq2 for differential expression analysis
Supplemental_Gene_Diffexpress.py	Python script: summarize DESeq2 differential expression
Supplemental_Run_Deseq2_Analyze_Equivexpress.sh	shell script: run DESeq2 for equivalent expression analysis
Supplemental_Deseq2_Analyze_Equivexpress.R	R script: run DESeq2 for equivalent expression analysis
Supplemental_Gene_Equivexpress.py	Python script: summarize DESeq2 equivalent expression
Supplemental_Run_Junctionseq_Analyze.sh	shell script: run JunctionSeq for differential usage analysis
Supplemental_Junctionseq_Analyze.R	R script: run JunctionSeq for differential usage analysis
3pmxe.wb	takes as input a gff file with only coding exons and a list of gene names, and outputs the list of 3 prime mutually exclusive exons
5pmxe.wb	takes as input a gff file with only coding exons and a list of gene names, and outputs the list of 5 prime mutually exclusive exons
A5SS.wb	takes as input a gff file with only coding exons and a list of gene names, and outputs the list of alternative 3 prime start sites
mxe.wb	takes as input a gff file with only coding exons and a list of gene names, and outputs the list of mutually exclusive exons
retained_introns.wb	takes as input a gff file with only coding exons and a list of gene names, and outputs the list of retained introns
skipped_exon.wb	takes as input a gff file with only coding exons and a list of gene names, and outputs the list of skipped exon
